# Supplementary material for: Exploring novel Cd(ii) complexes with 5-methyl-4-imidazolecarboxaldehyde: synthesis, structure, computational insights, and affinity to DNA through switchSense methodology
Source: Royal Society of Chemistry journal article supplement (doi:10.1039/d4dt00879k), 2024-01-01
Supplement: d4dt00879k1.pdf [file d4dt00879k1.pdf]

*Electronic Supporting Information*

**Exploring Novel Cd(II) Complexes with 5-Methyl-4-  
Imidazolecarboxaldehyde: Synthesis, Structure, Computational Insights,  
and Affinity to DNA through switchSense Methodology**

**Mateusz Kowalik,<sup>1,\*</sup> Paulina Nowicka,<sup>1</sup> Jakub Brzeski,<sup>1</sup> Natalia Żukowska,<sup>1</sup> Joanna Masternak,<sup>2</sup> Katarzyna Kazimierczuk,<sup>3</sup> Mariusz Makowski<sup>1</sup>**

<sup>1</sup> Faculty of Chemistry, University of Gdańsk, 80-308 Gdańsk, Poland

<sup>2</sup> Institute of Chemistry, Jan Kochanowski University in Kielce, 25-406 Kielce, Poland

<sup>3</sup> Faculty of Chemistry, Gdańsk University of Technology, 80-233 Gdańsk, Poland

**\*Corresponding author:** [mateusz.kowalik@ug.edu.pl](mailto:mateusz.kowalik@ug.edu.pl)

**Keywords:** Cd(II), imidazolecarboxaldehyde, crystal structure, computational analysis, switchSense technique

**Table S1.** Cartesian coordinates (in Å) of the gas-phase optimized structures of compounds 1–4.

| System                                                                                                                          | Cartesian Coordinates |                 |                 |                 |
|---------------------------------------------------------------------------------------------------------------------------------|-----------------------|-----------------|-----------------|-----------------|
| <p style="text-align: center;"><b>1</b></p> 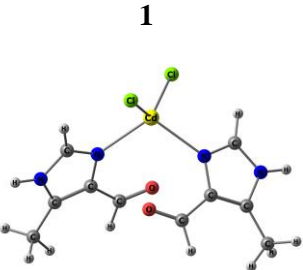   | C                     | -0.176260641497 | 2.972986080498  | 0.331911166905  |
|                                                                                                                                 | H                     | -0.739280333997 | 3.173820827066  | 1.241512591868  |
|                                                                                                                                 | C                     | 0.710169499764  | 3.254429048004  | -1.707313985996 |
|                                                                                                                                 | C                     | 0.946556278958  | 1.956973054480  | -1.230595591136 |
|                                                                                                                                 | C                     | 1.579698764817  | 0.843217704382  | -1.940326418836 |
|                                                                                                                                 | H                     | 2.022711701644  | 1.094760209948  | -2.930947080939 |
|                                                                                                                                 | C                     | 1.055515530852  | 3.948521613766  | -2.988062419698 |
|                                                                                                                                 | H                     | 0.145600054009  | 4.245820520272  | -3.534151871945 |
|                                                                                                                                 | H                     | 1.638187281495  | 3.279629436996  | -3.635002927152 |
|                                                                                                                                 | H                     | 1.659376533398  | 4.850833446437  | -2.799393294039 |
|                                                                                                                                 | C                     | 0.176260641497  | -2.972986080498 | 0.331911166905  |
|                                                                                                                                 | H                     | 0.739280333997  | -3.173820827066 | 1.241512591868  |
|                                                                                                                                 | C                     | -0.710169499764 | -3.254429048004 | -1.707313985996 |
|                                                                                                                                 | C                     | -0.946556278958 | -1.956973054480 | -1.230595591136 |
|                                                                                                                                 | C                     | -1.579698764817 | -0.843217704382 | -1.940326418836 |
|                                                                                                                                 | H                     | -2.022711701644 | -1.094760209948 | -2.930947080939 |
|                                                                                                                                 | C                     | -1.055515530852 | -3.948521613766 | -2.988062419698 |
|                                                                                                                                 | H                     | -0.145600054009 | -4.245820520272 | -3.534151871945 |
|                                                                                                                                 | H                     | -1.638187281495 | -3.279629436996 | -3.635002927152 |
|                                                                                                                                 | H                     | -1.659376533398 | -4.850833446437 | -2.799393294039 |
| Cd                                                                                                                              | 0.000000000000        | 0.000000000000  | 1.366565515640  |                 |
| Cl                                                                                                                              | -1.901973456323       | 1.018910943511  | 2.439998628302  |                 |
| Cl                                                                                                                              | 1.901973456323        | -1.018910943511 | -2.439998628302 |                 |
| N                                                                                                                               | 0.396662063458        | 1.811214165803  | 0.031517840184  |                 |
| N                                                                                                                               | 0.000000000000        | 3.863669126703  | -0.694939529824 |                 |
| H                                                                                                                               | -0.352461136707       | 4.815695098126  | -0.708121261012 |                 |
| N                                                                                                                               | -0.396662063458       | -1.811214165803 | 0.031517840184  |                 |
| N                                                                                                                               | 0.000000000000        | -3.863669126703 | -0.694939529824 |                 |
| H                                                                                                                               | 0.352461136707        | -4.815695098126 | -0.708121261012 |                 |
| O                                                                                                                               | 1.616361371151        | -0.310529245270 | -1.507646234014 |                 |
| O                                                                                                                               | -1.616361371151       | 0.310529245270  | -1.507646234014 |                 |
| <p style="text-align: center;"><b>2</b></p>  | C                     | 0.000000000000  | 3.024354639001  | -0.026766630668 |
|                                                                                                                                 | H                     | -0.568860113316 | 3.252742274356  | 0.872625936229  |
|                                                                                                                                 | C                     | 0.974602720781  | 3.277597025936  | -2.029657761591 |
|                                                                                                                                 | C                     | 1.080877197194  | 1.953057910145  | -1.581909244021 |
|                                                                                                                                 | C                     | 1.641350893593  | 0.799835224331  | -2.290791308456 |
|                                                                                                                                 | H                     | 2.141438480741  | 1.024101569062  | -3.260267862767 |
|                                                                                                                                 | C                     | 1.424837313067  | 3.970073135123  | -3.278260333742 |
|                                                                                                                                 | H                     | 0.565490746520  | 4.366586684986  | -3.842879329538 |
|                                                                                                                                 | H                     | 1.962972315785  | 3.265940637585  | -3.926461420780 |
|                                                                                                                                 | H                     | 2.104343436050  | 4.805657775194  | -3.044869306331 |
|                                                                                                                                 | C                     | 0.000000000000  | -3.024354639001 | -0.026766630668 |
|                                                                                                                                 | H                     | 0.568860113316  | -3.252742274356 | 0.872625936229  |
|                                                                                                                                 | C                     | -0.974602720781 | -3.277597025936 | -2.029657761591 |
|                                                                                                                                 | C                     | -1.080877197194 | -1.953057910145 | -1.581909244021 |
|                                                                                                                                 | C                     | -1.641350893593 | -0.799835224331 | -2.290791308456 |
|                                                                                                                                 | H                     | -2.141438480741 | -1.024101569062 | -3.260267862767 |
|                                                                                                                                 | C                     | -1.424837313067 | -3.970073135123 | -3.278260333742 |
|                                                                                                                                 | H                     | -0.565490746520 | -4.366586684986 | -3.842879329538 |
|                                                                                                                                 | H                     | -1.962972315785 | -3.265940637585 | -3.926461420780 |
|                                                                                                                                 | H                     | -2.104343436050 | -4.805657775194 | -3.044869306331 |
| Br                                                                                                                              | 2.025065640801        | -1.037650247629 | 2.045606126689  |                 |
| Br                                                                                                                              | -2.025065640801       | 1.037650247629  | 2.045606126689  |                 |
| Cd                                                                                                                              | 0.000000000000        | 0.000000000000  | 0.934105997731  |                 |
| N                                                                                                                               | 0.478465145987        | 1.825313776096  | -0.342936162659 |                 |
| N                                                                                                                               | 0.286780264586        | 3.921677483820  | -1.022794697052 |                 |
| H                                                                                                                               | 0.021162938194        | 4.901608500905  | -1.019720193111 |                 |
| N                                                                                                                               | -0.478465145987       | -1.825313776096 | -0.342936162659 |                 |
| N                                                                                                                               | -0.286780264586       | -3.921677483820 | -1.022794697052 |                 |
| H                                                                                                                               | -0.021162938194       | -4.901608500905 | -1.019720193111 |                 |
| O                                                                                                                               | 1.561113313692        | -0.357275385469 | -1.873594818190 |                 |
| O                                                                                                                               | -1.561113313692       | 0.357275385469  | -1.873594818190 |                 |
|                                                                                                                                 | C                     | 3.065768219845  | -0.290337020984 | 0.676084050133  |
|                                                                                                                                 | H                     | 2.939682209788  | -0.691849050022 | 1.679393123226  |
|                                                                                                                                 | C                     | 4.026810292069  | 0.684207047908  | -1.100844081403 |

3

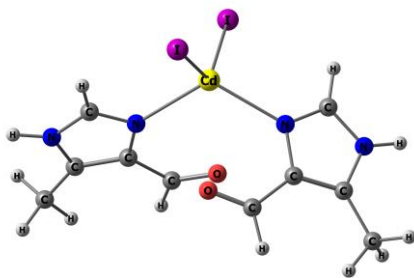

|    |                 |                 |                 |
|----|-----------------|-----------------|-----------------|
| C  | 2.669154189806  | 0.433036031121  | -1.337156098435 |
| C  | 1.844408131690  | 0.795686056649  | -2.492960179662 |
| H  | 2.375525169856  | 1.256439089238  | -3.355445243555 |
| C  | 5.101545365976  | 1.321313092528  | -1.925062137043 |
| H  | 5.487423395070  | 2.231170161961  | -1.437535101077 |
| H  | 4.701658337610  | 1.604457116177  | -2.907814208626 |
| H  | 5.942622405508  | 0.627780047039  | -2.086149152748 |
| Cd | -0.099481007372 | -0.552886040788 | 0.147561010795  |
| I  | 0.027096001965  | -0.126558009175 | 2.845449204011  |
| N  | 2.102936152658  | -0.173133012393 | -0.231759016729 |
| N  | 4.239768304200  | 0.213924015145  | 0.179045012899  |
| H  | 5.120844370287  | 0.245950017521  | 0.682681048891  |
| O  | 0.624404044360  | 0.621069042334  | -2.517752181404 |
| C  | -2.818571201429 | 0.800379059790  | -0.830408058885 |
| H  | -3.221408234205 | -0.199744014360 | -0.982609072015 |
| C  | -2.706666194418 | 3.036001216406  | -0.697022048678 |
| C  | -1.463690104659 | 2.451238178443  | -0.413351029578 |
| C  | -0.188251013718 | 3.112988224512  | -0.122270008666 |
| H  | -0.228717016442 | 4.220155301985  | -0.013761000990 |
| C  | -3.174610227227 | 4.456998321928  | -0.753640056076 |
| H  | -3.524932254866 | 4.720418337850  | -1.764755128604 |
| H  | -2.351650168786 | 5.134559369264  | -0.490510035107 |
| H  | -3.998505288950 | 4.629794331494  | -0.042541003080 |
| I  | -1.212844086313 | -2.640013192469 | -1.153800081693 |
| N  | -1.560409111068 | 1.074094076214  | -0.502475035925 |
| N  | -3.534321256291 | 1.963657139938  | -0.957318066711 |
| H  | -4.517916323107 | 2.021281145036  | -1.202701086685 |
| O  | 0.878585064731  | 2.504874182082  | -0.013652001008 |

4

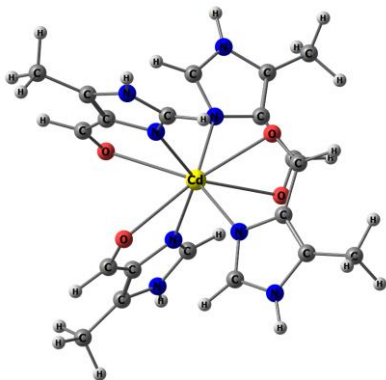

|    |                 |                 |                 |
|----|-----------------|-----------------|-----------------|
| C  | -2.493381129580 | 0.850097299666  | -2.128448317010 |
| H  | -2.327420867672 | 0.061114621748  | -2.859948269042 |
| C  | -3.400929843185 | 2.665541295639  | -1.188505113214 |
| C  | -2.393618343261 | 2.124770884386  | -0.379743276717 |
| C  | -1.902802153186 | 2.546211884199  | 0.929362214741  |
| H  | -2.358428246707 | 3.454218616588  | 1.380476463660  |
| C  | -4.302866790817 | 3.848768257386  | -1.040426031013 |
| H  | -4.134464873331 | 4.574791087305  | -1.852762104750 |
| H  | -4.114970740201 | 4.358956255978  | -0.085227711305 |
| H  | -5.361990500866 | 3.543865063229  | -1.062437253937 |
| C  | 2.270021276061  | 0.071484976561  | -2.513182174931 |
| H  | 2.801884464732  | 0.966544404342  | -2.195200317438 |
| C  | 1.770554038110  | -1.734521750672 | -3.734607547683 |
| C  | 0.858650095203  | -1.562814745550 | -2.685721618200 |
| C  | -0.319728489554 | -2.343299556001 | -2.319040419874 |
| H  | -0.550799447269 | -3.242217341048 | -2.930698584595 |
| C  | 1.897016007435  | -2.755468624272 | -4.819557367070 |
| H  | 1.845005890310  | -2.283667968839 | -5.814500232525 |
| H  | 1.085959791209  | -3.493921325052 | -4.749763766942 |
| H  | 2.855476086275  | -3.294548631721 | -4.741521164525 |
| C  | 2.461906878626  | 0.126615894286  | 2.324266754305  |
| H  | 2.356732577589  | -0.891698325675 | 2.694543458033  |
| C  | 3.238009942702  | 2.218347922046  | 2.165340946111  |
| C  | 2.257257510232  | 1.965806054662  | 1.198101022944  |
| C  | 1.722828208786  | 2.825261081378  | 0.145518114087  |
| H  | 2.112881515167  | 3.864310103229  | 0.083756491130  |
| C  | 4.060145828745  | 3.423109767816  | 2.494108753589  |
| H  | 3.857600723098  | 3.768202915680  | 3.521356127935  |
| H  | 3.826047661776  | 4.248217968382  | 1.806801679522  |
| H  | 5.136805134008  | 3.202336506231  | 2.408857647887  |
| C  | -2.239384654482 | -1.047784129534 | 2.315865943766  |
| H  | -2.832301012077 | -0.135789126334 | 2.358757617210  |
| C  | -1.608673060736 | -3.148121513889 | -2.756158412108 |
| C  | -0.722145050789 | -2.527490577399 | 1.867307493958  |
| C  | 0.500522472949  | -3.028460250104 | 1.245752576949  |
| H  | 0.797503494744  | -4.076243808126 | 1.468218396090  |
| C  | -1.655725649597 | -4.513815643936 | 3.362875114386  |
| H  | -1.625612849993 | -4.458824650200 | 4.463451283931  |
| H  | -0.797720605586 | -5.113591387536 | 3.028062774489  |
| H  | -2.576639628935 | -5.043019050167 | 3.067554833365  |
| Cd | 0.000435123136  | -0.000737307159 | 0.000750796935  |
| N  | -1.843990097538 | 1.001677974183  | -0.977652649731 |

|   |                 |                 |                 |
|---|-----------------|-----------------|-----------------|
| N | -3.430206045308 | 1.831537080465  | -2.281520022510 |
| H | -4.055970583208 | 1.927443387038  | -3.080326642688 |
| N | 1.183731161830  | -0.439994396555 | -1.941038643787 |
| N | 2.644099541520  | -0.682585744069 | -3.588237586286 |
| H | 3.444304840669  | -0.491956221494 | -4.190071067369 |
| N | 1.789067383543  | 0.666262441015  | 1.311795157066  |
| N | 3.335324072428  | 1.032314500510  | 2.854486900535  |
| H | 3.964119065555  | 0.854194846108  | 3.636639709426  |
| N | -1.128561930613 | -1.228269417909 | 1.606996722463  |
| N | -2.550881630000 | -2.179864400922 | 3.012746649201  |
| H | -3.354852226363 | -2.287714296214 | 3.629895123133  |
| O | -1.020723708970 | 1.918764139306  | 1.524214868932  |
| O | -1.042997927695 | -2.019718267658 | -1.371520387434 |
| O | 0.875243384489  | 2.418917180388  | -0.655784445729 |
| O | 1.189721337161  | -2.319036832052 | 0.505897296633  |

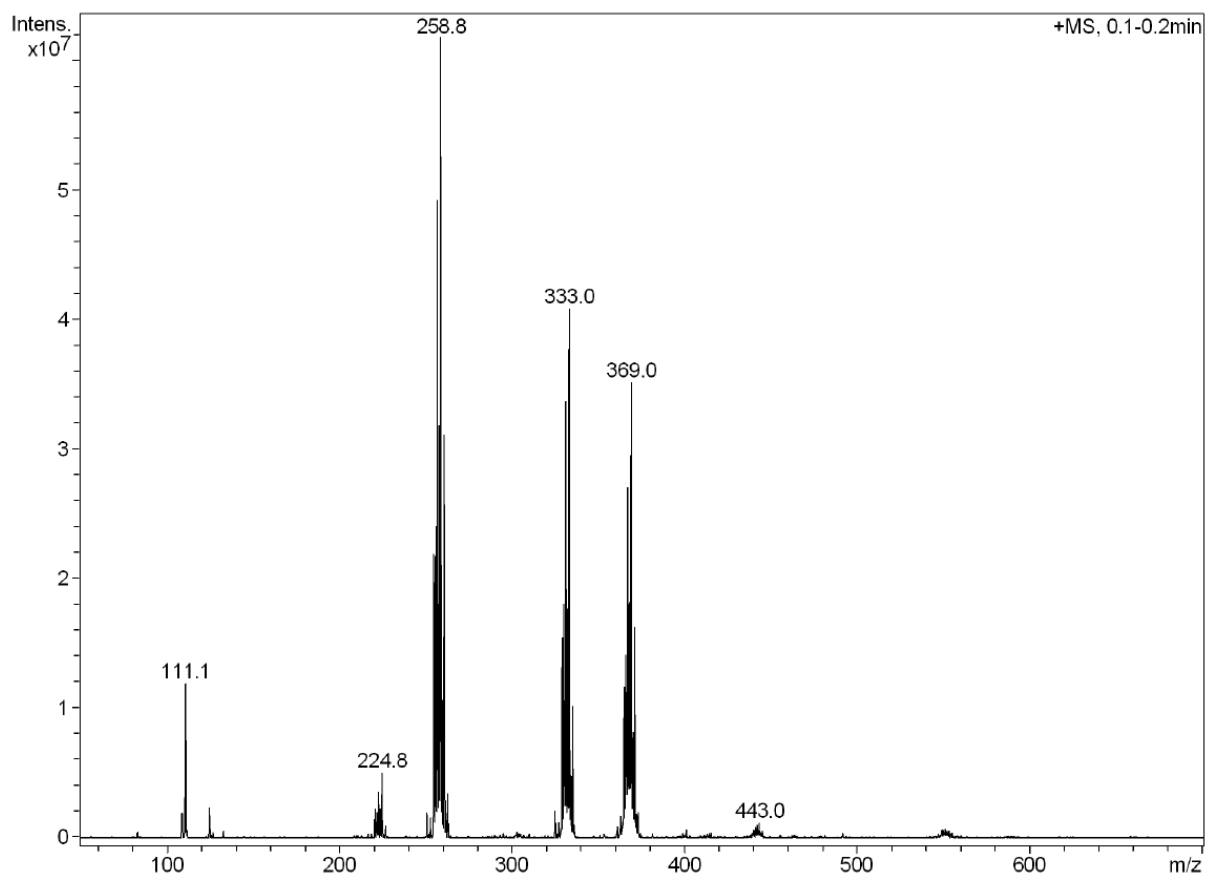

**Figure S1.** The ESI-MS spectrogram for CH<sub>3</sub>OH/H<sub>2</sub>O solution of complex **1**.

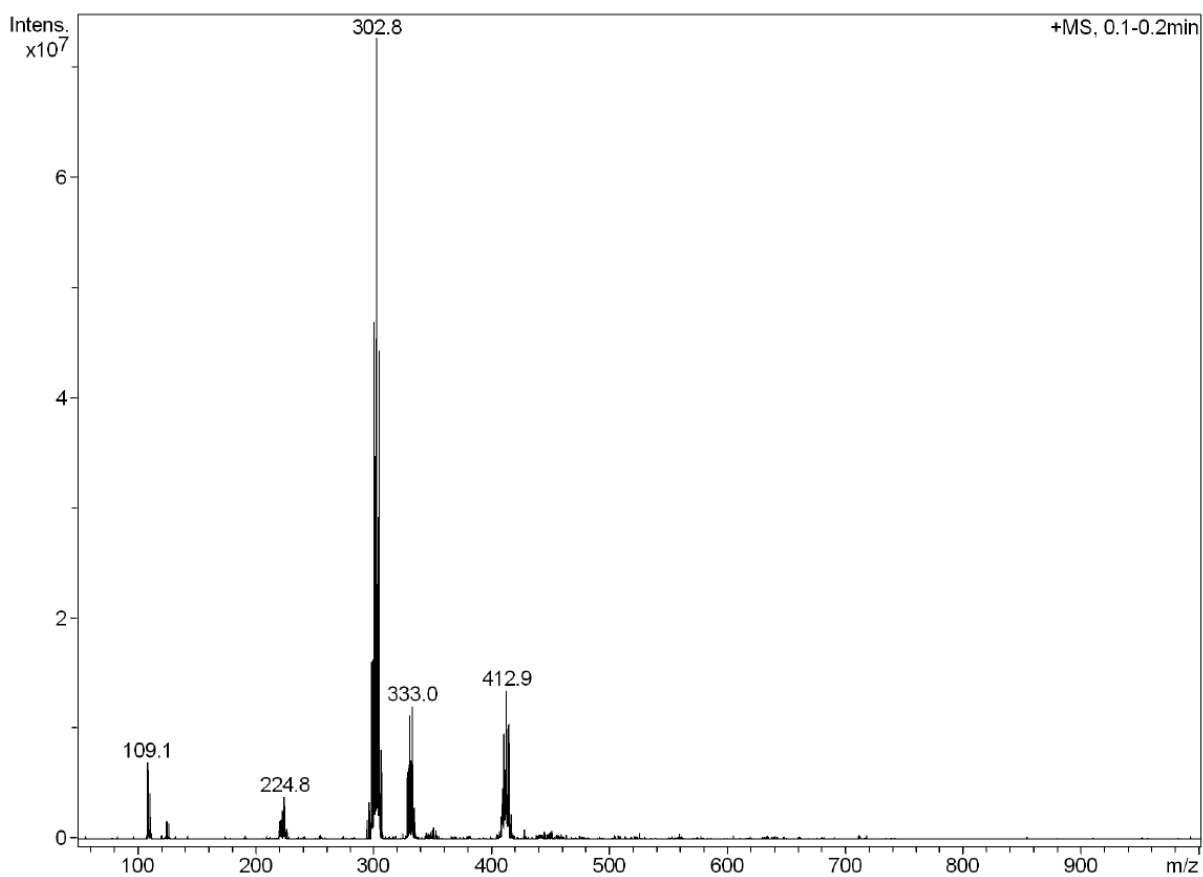

**Figure S2.** The ESI-MS spectrogram for CH<sub>3</sub>OH/H<sub>2</sub>O solution of complex **2**.

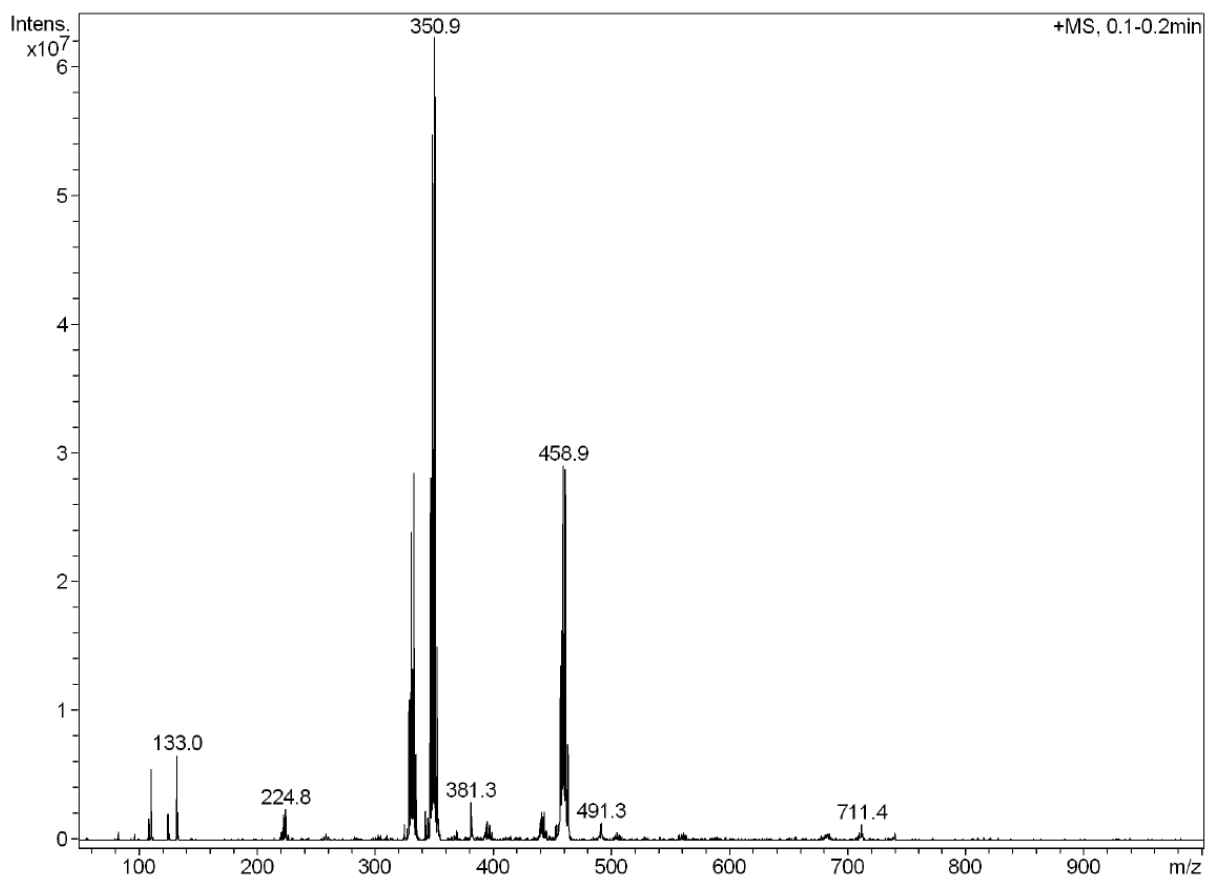

**Figure S3.** The ESI-MS spectrogram for CH<sub>3</sub>OH/H<sub>2</sub>O solution of complex **3**.

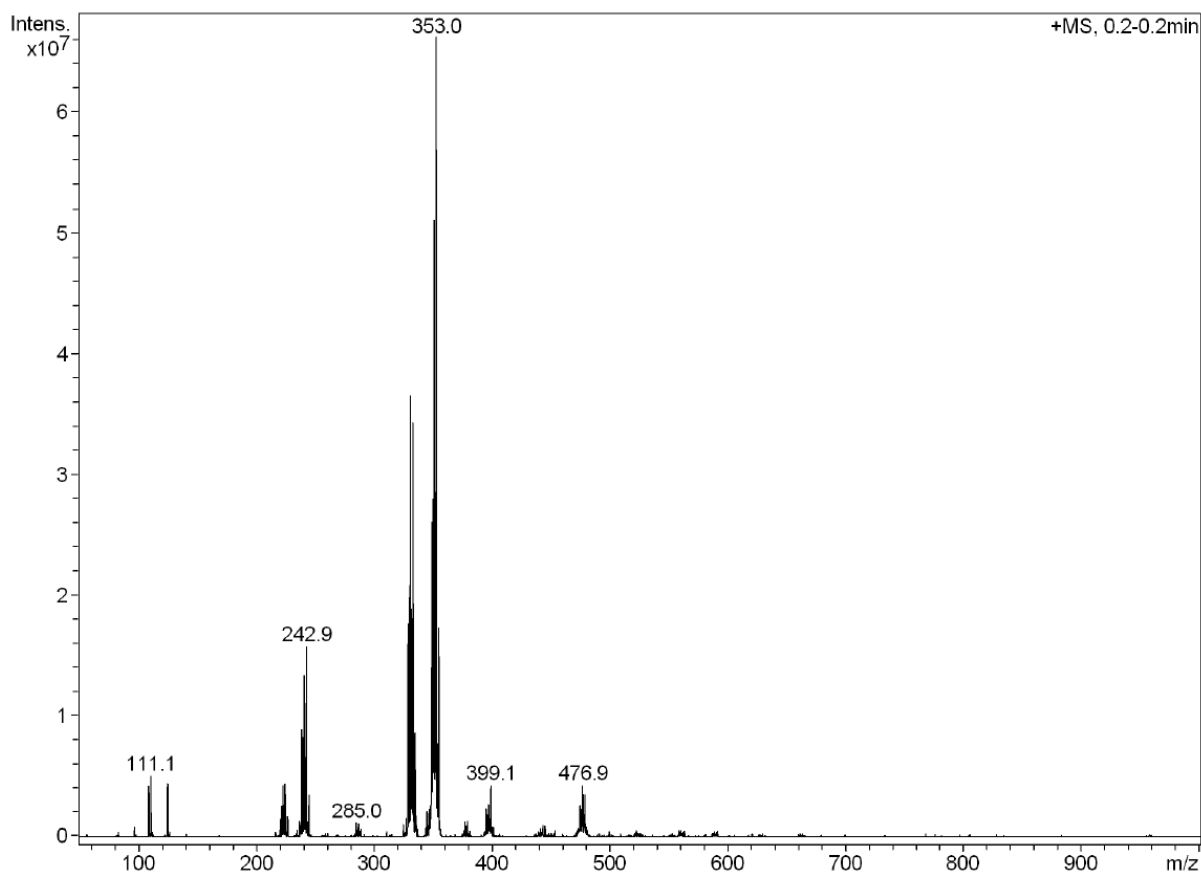

**Figure S4.** The ESI-MS spectrogram for CH<sub>3</sub>OH/H<sub>2</sub>O solution of complex **4**.

**Table S2.**

Bond lengths [Å] for complexes **1–4** obtained from X-ray analysis. Atoms numbering as in Fig. 1 (manuscript).

| <b>Bond lengths [Å]</b> |          |             |           |
|-------------------------|----------|-------------|-----------|
| <b>1</b>                |          |             |           |
| Cd(1)-N(3)              | 2.248(5) | Cd(1)-Cl(2) | 2.511(2)  |
| Cd(1)-N(1)              | 2.260(5) | Cd(1)-O(2)  | 2.622(5)  |
| Cd(1)-Cl(1)             | 2.504(2) | Cd(1)-O(1)  | 2.640(5)  |
| <b>2</b>                |          |             |           |
| Cd(1)-N(3)              | 2.271(2) | Cd(1)-O(1)  | 2.609(2)  |
| Cd(1)-N(1)              | 2.312(2) | Cd(1)-Br(2) | 2.5970(4) |
| Cd(1)-O(2)              | 2.556(2) | Cd(1)-Br(1) | 2.6587(4) |
| <b>3</b>                |          |             |           |
| Cd(1)-N(1)              | 2.270(3) | Cd(1)-O(1)a | 2.718(3)  |
| Cd(1)-N(1)a             | 2.270(3) | Cd(1)-I(1)  | 2.7874(4) |
| Cd(1)-O(1)              | 2.718(3) | Cd(1)-I(1)a | 2.7874(4) |
| <b>4</b>                |          |             |           |
| Cd(1)-N(1)              | 2.260(3) | Cd(1)-O(2)  | 2.621(3)  |
| Cd(1)-N(5)              | 2.263(3) | Cd(1)-O(3)  | 2.750(3)  |
| Cd(1)-N(3)              | 2.299(3) | Cd(1)-O(4)  | 2.848(3)  |
| Cd(1)-N(7)              | 2.307(3) | Cd(1)-O(1)  | 2.873(3)  |
| a = 1-x, y, 0.5-z       |          |             |           |

**Table S3.**

Valence angles [°] for complexes **1–4** obtained from X-ray analysis. Atoms numbering as in Fig. 1 (manuscript).

| Angles [°]        |             |                   |             |
|-------------------|-------------|-------------------|-------------|
| <b>1</b>          |             |                   |             |
| N(3)-Cd(1)-N(1)   | 141.31(18)  | Cl(1)-Cd(1)-O(1)  | 161.09(11)  |
| N(3)-Cd(1)-Cl(1)  | 103.43(14)  | Cl(2)-Cd(1)-O(1)  | 91.63(12)   |
| N(1)-Cd(1)-Cl(1)  | 98.77(14)   | N(3)-Cd(1)-O(2)   | 68.86(16)   |
| N(3)-Cd(1)-Cl(2)  | 95.86(14)   | N(1)-Cd(1)-O(2)   | 80.19(16)   |
| N(1)-Cd(1)-Cl(2)  | 107.79(14)  | Cl(1)-Cd(1)-O(2)  | 89.48(12)   |
| Cl(1)-Cd(1)-Cl(2) | 106.21(7)   | Cl(2)-Cd(1)-O(2)  | 160.58(11)  |
| N(3)-Cd(1)-O(1)   | 80.39(16)   | O(1)-Cd(1)-O(2)   | 74.48(12)   |
| N(1)-Cd(1)-O(1)   | 69.11(16)   |                   |             |
| <b>2</b>          |             |                   |             |
| N(3)-Cd(1)-N(1)   | 139.08(8)   | O(2)-Cd(1)-O(1)   | 80.84(7)    |
| N(3)-Cd(1)-O(2)   | 69.82(7)    | Br(2)-Cd(1)-O(1)  | 168.42(5)   |
| N(1)-Cd(1)-O(2)   | 84.19(7)    | N(3)-Cd(1)-Br(1)  | 101.17(6)   |
| N(3)-Cd(1)-Br(2)  | 105.87(6)   | N(1)-Cd(1)-Br(1)  | 97.01(6)    |
| N(1)-Cd(1)-Br(2)  | 104.57(6)   | O(2)-Cd(1)-Br(1)  | 165.86(5)   |
| O(2)-Cd(1)-Br(2)  | 88.84(5)    | Br(2)-Cd(1)-Br(1) | 104.388(13) |
| N(3)-Cd(1)-O(1)   | 75.56(8)    | O(1)-Cd(1)-Br(1)  | 86.39(5)    |
| N(1)-Cd(1)-O(1)   | 69.34(7)    |                   |             |
| <b>3</b>          |             |                   |             |
| N(1)a-Cd(1)-N(1)  | 130.51(13)  | N(1)-Cd(1)-O(1)   | 67.98(13)   |
| N(1)a-Cd(1)-I(1)  | 106.48(7)   | N(1)-Cd(1)-O(1)a  | 72.54(13)   |
| N(1)-Cd(1)-I(1)   | 103.01(7)   | O(1)-Cd(1)-I(1)   | 91.30(7)    |
| N(1)a-Cd(1)-I(1)a | 103.01(7)   | O(1)-Cd(1)-I(1)a  | 163.16(7)   |
| N(1)-Cd(1)-I(1)a  | 106.48(7)   | O(1)a-Cd(1)-I(1)  | 163.16(7)   |
| I(1)-Cd(1)-I(1)a  | 105.130(16) | O(1)a-Cd(1)-I(1)a | 91.30(7)    |
| N(1)a-Cd(1)-O(1)a | 67.98(13)   | O(1)-Cd(1)-O(1)a  | 72.60(13)   |
| N(1)a-Cd(1)-O(1)  | 72.54(13)   |                   |             |
| <b>4</b>          |             |                   |             |
| N(1)-Cd(1)-O(3)   | 79.20(11)   | O(1)-Cd(1)-N(7)   | 79.00(11)   |
| N(1)-Cd(1)-O(1)   | 65.74(11)   | O(1)-Cd(1)-O(4)   | 125.28(11)  |
| N(1)-Cd(1)-N(5)   | 128.68(12)  | O(1)-Cd(1)-O(2)   | 136.07(11)  |
| N(1)-Cd(1)-N(7)   | 95.43(11)   | O(1)-Cd(1)-N(3)   | 150.80(11)  |
| N(1)-Cd(1)-O(4)   | 151.94(11)  | N(5)-Cd(1)-N(7)   | 98.89(11)   |
| N(1)-Cd(1)-O(2)   | 82.23(10)   | N(5)-Cd(1)-O(4)   | 76.62(11)   |
| N(1)-Cd(1)-N(3)   | 112.12(12)  | N(5)-Cd(1)-O(2)   | 149.09(10)  |
| O(3)-Cd(1)-O(1)   | 75.75(11)   | N(5)-Cd(1)-N(3)   | 95.74(11)   |
| O(3)-Cd(1)-N(5)   | 66.99(11)   | N(7)-Cd(1)-O(4)   | 65.41(11)   |
| O(3)-Cd(1)-N(7)   | 154.16(11)  | N(7)-Cd(1)-O(2)   | 74.82(10)   |
| O(3)-Cd(1)-O(4)   | 126.99(11)  | N(7)-Cd(1)-N(3)   | 129.22(11)  |
| O(3)-Cd(1)-O(2)   | 128.49(11)  | O(4)-Cd(1)-O(2)   | 73.26(11)   |
| O(3)-Cd(1)-N(3)   | 75.32(11)   | O(4)-Cd(1)-N(3)   | 71.34(11)   |
| O(1)-Cd(1)-N(5)   | 65.74(11)   | O(2)-Cd(1)-N(3)   | 68.17(10)   |
| a = 1-x, y, 0.5-z |             |                   |             |

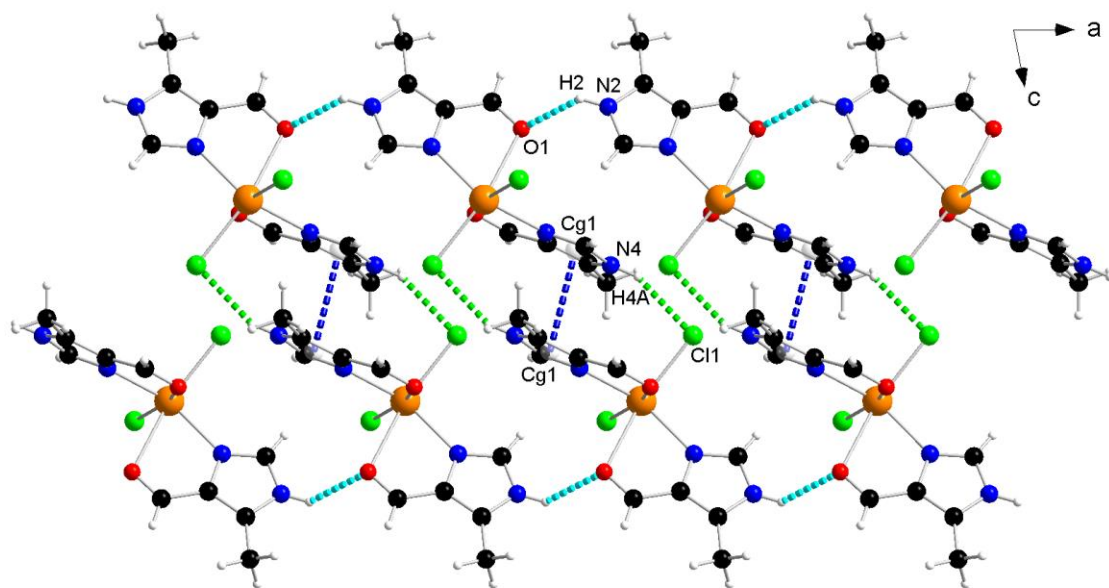

(a)

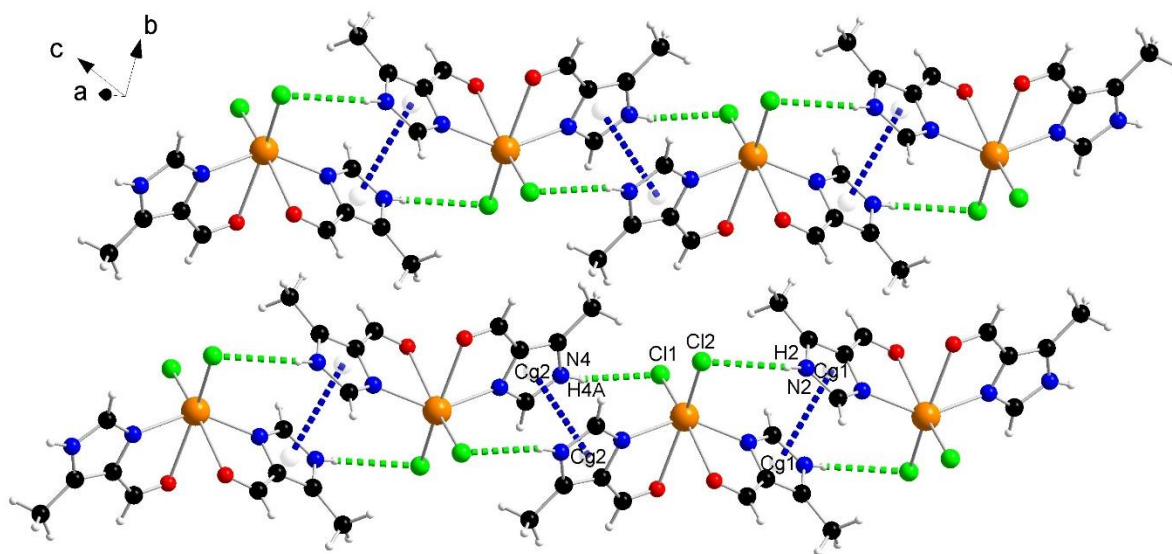

(b)

**Figure S5.** The geometry of non-covalent interactions in the crystal structure of complex 1.



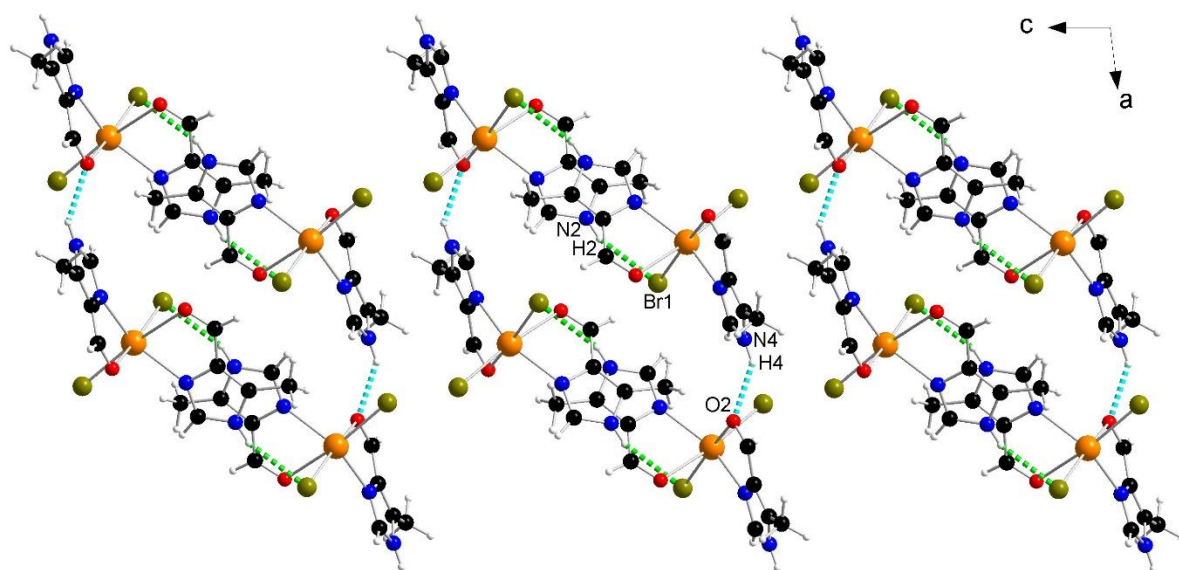

(a)

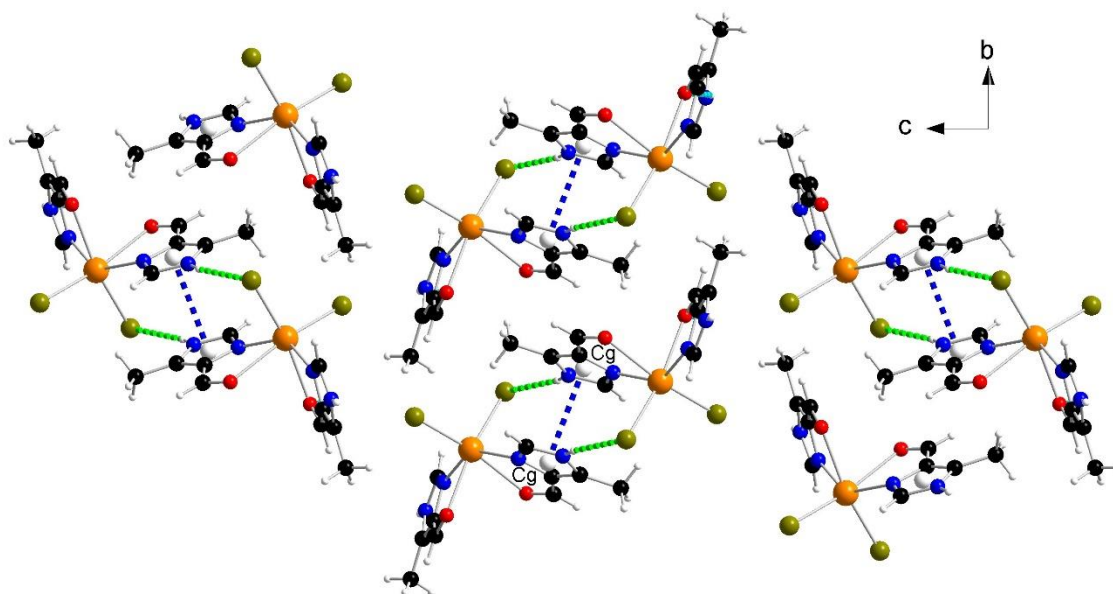

(b)

**Figure S6.** The geometry of hydrogen bonds (a) and  $\pi$ - $\pi$  stacking interactions (b) in the crystal structure of complex 2.

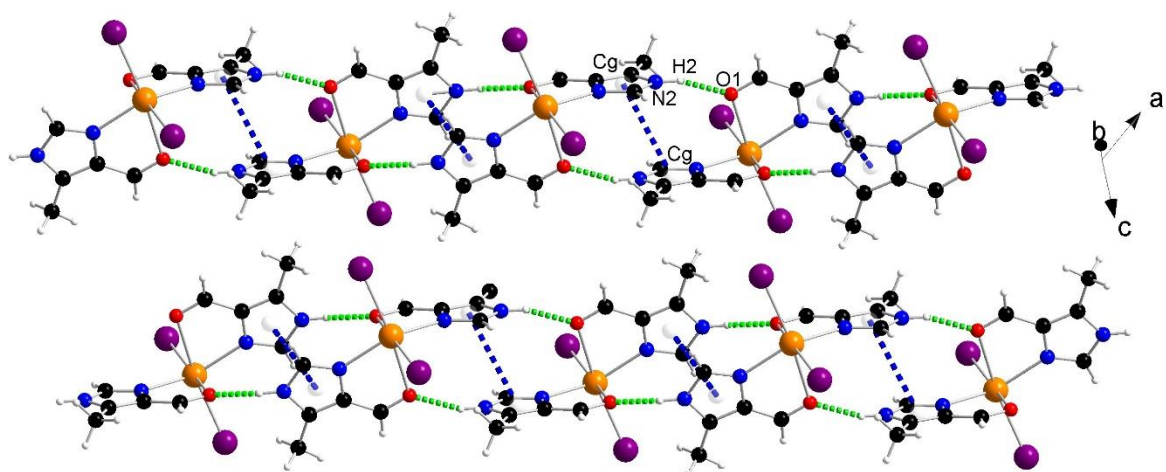

**Figure S7.** The geometry of non-covalent interactions in the crystal structure of complex 3.

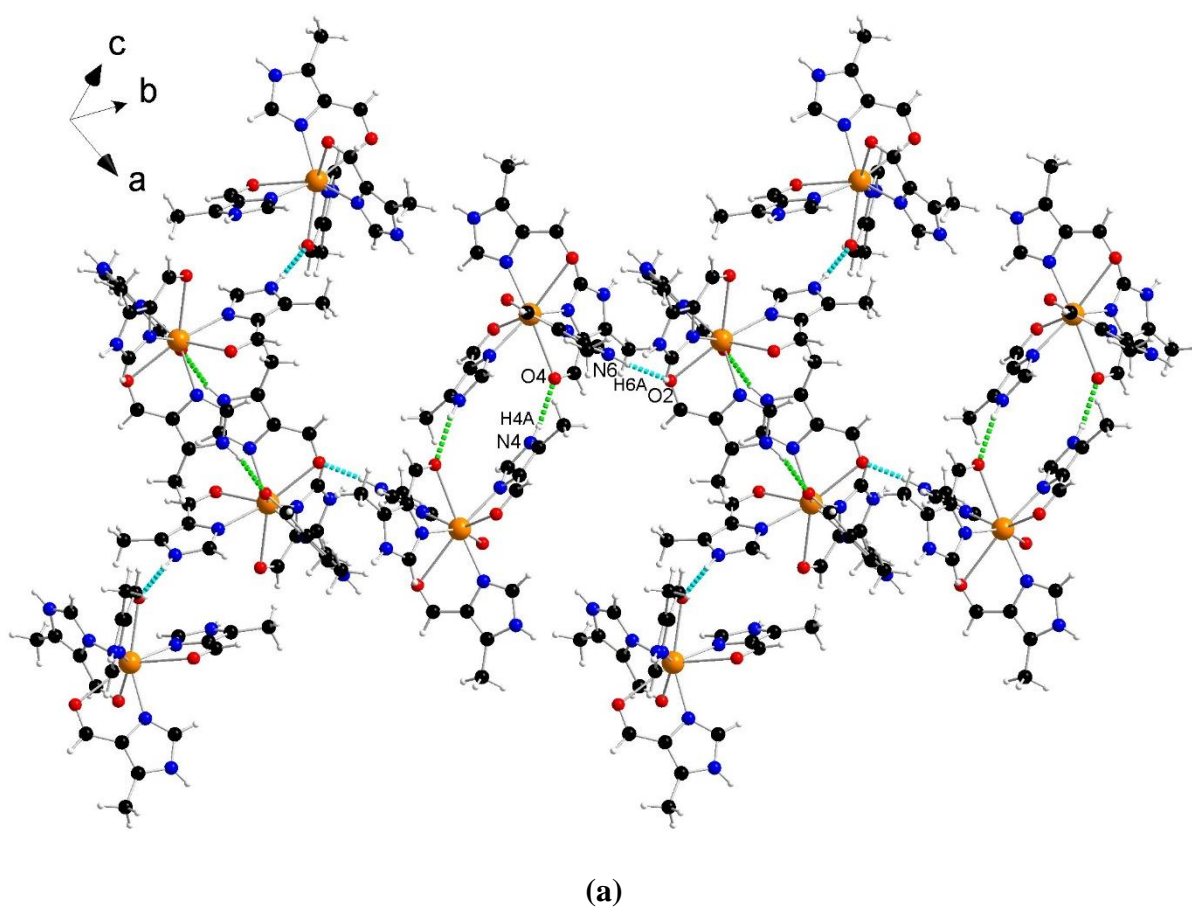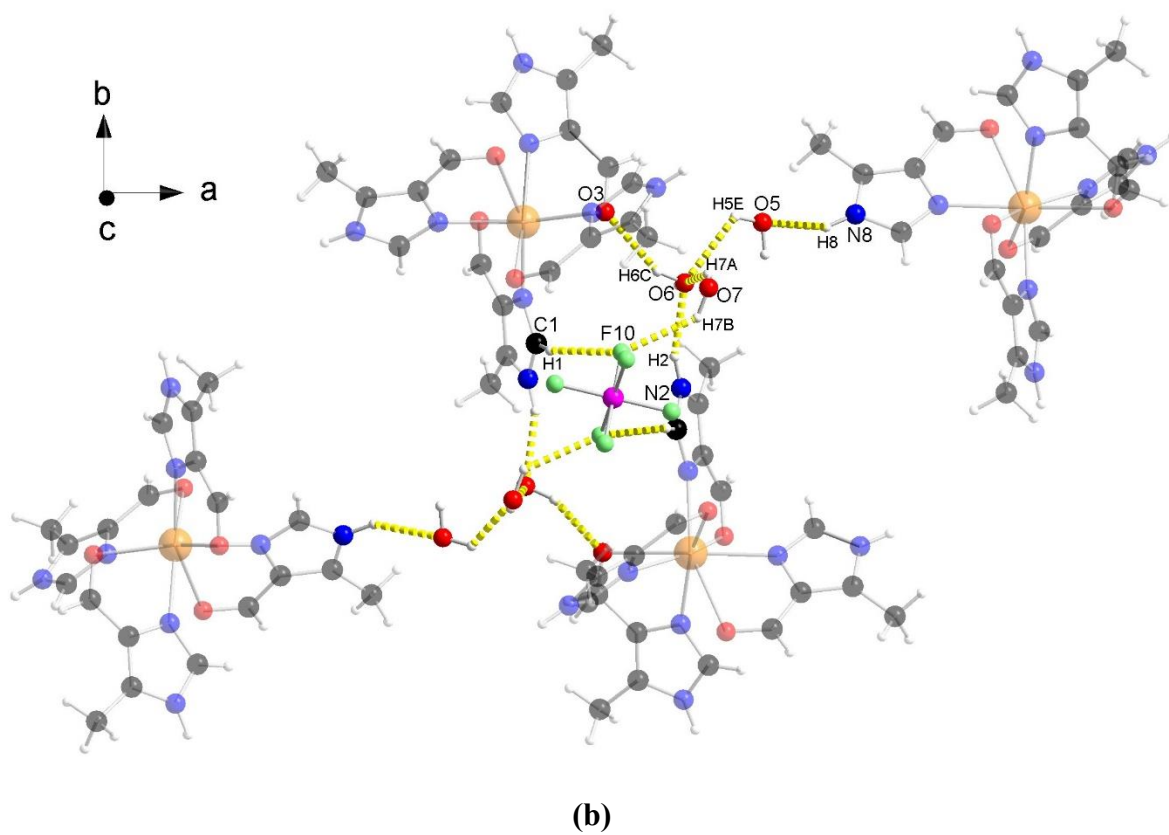

**Figure S8.** The geometry of N–H···O hydrogen bonds (a) and H-bonds formed by H<sub>2</sub>O and PF<sub>6</sub><sup>−</sup> anions (b) in the crystal structure of complex 4.

**Table S4.**

The geometry of the most important hydrogen bonds in the crystal structures of complexes 1–4. Atoms numbering as in Fig. 1 (manuscript).

| D–H···A      | D–H [Å] | H···A [Å] | D···A [Å] | D–H···A [°] | Symmetry code                |
|--------------|---------|-----------|-----------|-------------|------------------------------|
| <b>1</b>     |         |           |           |             |                              |
| N2–H2···O1   | 0.880   | 2.432     | 3.061     | 128.83      | -1+x, y, z                   |
| N4–H4A···Cl1 | 0.880   | 2.449     | 3.234     | 148.66      | 1-x, 1-y, 2-z                |
| N2–H2···Cl2  | 0.880   | 2.626     | 3.340     | 139.04      | -x, 2-y, 1-z                 |
| <b>2</b>     |         |           |           |             |                              |
| N4–H4···O2   | 0.880   | 2.142     | 2.891     | 142.60      | 1+x, y, z                    |
| N2–H2···Br1  | 0.880   | 2.566     | 3.407     | 160.21      | -x, -y, 1-z                  |
| <b>3</b>     |         |           |           |             |                              |
| N2–H2···O1   | 0.880   | 1.990     | 2.811     | 154.66      | 0.5+x, 1.5-y,<br>0.5+z       |
| <b>4</b>     |         |           |           |             |                              |
| N6–H6A···O2  | 0.880   | 1.867     | 2.743     | 173.67      | -0.25+x, 1.25-y, -<br>0.25+z |
| N2–H2···O6   | 0.880   | 1.976     | 2.819     | 160.16      | 1-x, 1.5-y, z                |
| N4–H4A···O4  | 0.880   | 2.030     | 2.858     | 156.49      | 1-x, 1-y, 1-z                |
| N8–H8···O5   | 0.880   | 2.234     | 2.988     | 143.62      | –                            |
| O6–H6C···O3  | 0.850   | 2.234     | 2.853     | 129.67      | –                            |
| O7–H7A···O6  | 0.849   | 2.103     | 2.843     | 145.30      | –                            |
| O5–H5E···O6  | 0.850   | 2.414     | 2.951     | 121.80      | 0.5+x, y, 0.5-z              |
| O7–H7B···F10 | 0.850   | 2.205     | 2.864     | 134.26      | –                            |
| C1–H1···F10  | 0.949   | 2.286     | 3.137     | 148.90      | –                            |

**Table S5.**

Selected FT-IR spectroscopic data for ligand (L) and complexes 1–4.

| Compound | Vibration band (cm <sup>-1</sup> )    |                   |                        |                      | $\Delta\nu$ |       |
|----------|---------------------------------------|-------------------|------------------------|----------------------|-------------|-------|
|          | $\nu(\text{OH})_{\text{H}_2\text{O}}$ | $\nu(\text{C=O})$ | $\nu(\text{C=C, C=N})$ | $\nu(\text{PF}_6^-)$ | (C=O)       | (C=N) |
| <b>L</b> | -                                     | 1664              | 1512, 1439             | -                    | -           | -     |
| <b>1</b> | -                                     | 1642, 1616        | 1516, 1436             | -                    | 48          | 3     |
| <b>2</b> | -                                     | 1659, 1619        | 1512, 1445             | -                    | 45          | 6     |
| <b>3</b> | -                                     | 1622 broad        | 1519, 1449             | -                    | 42          | 10    |
| <b>4</b> | 3653 broad                            | 1650, 1623        | 1523, 1451             | 830                  | 41          | 12    |

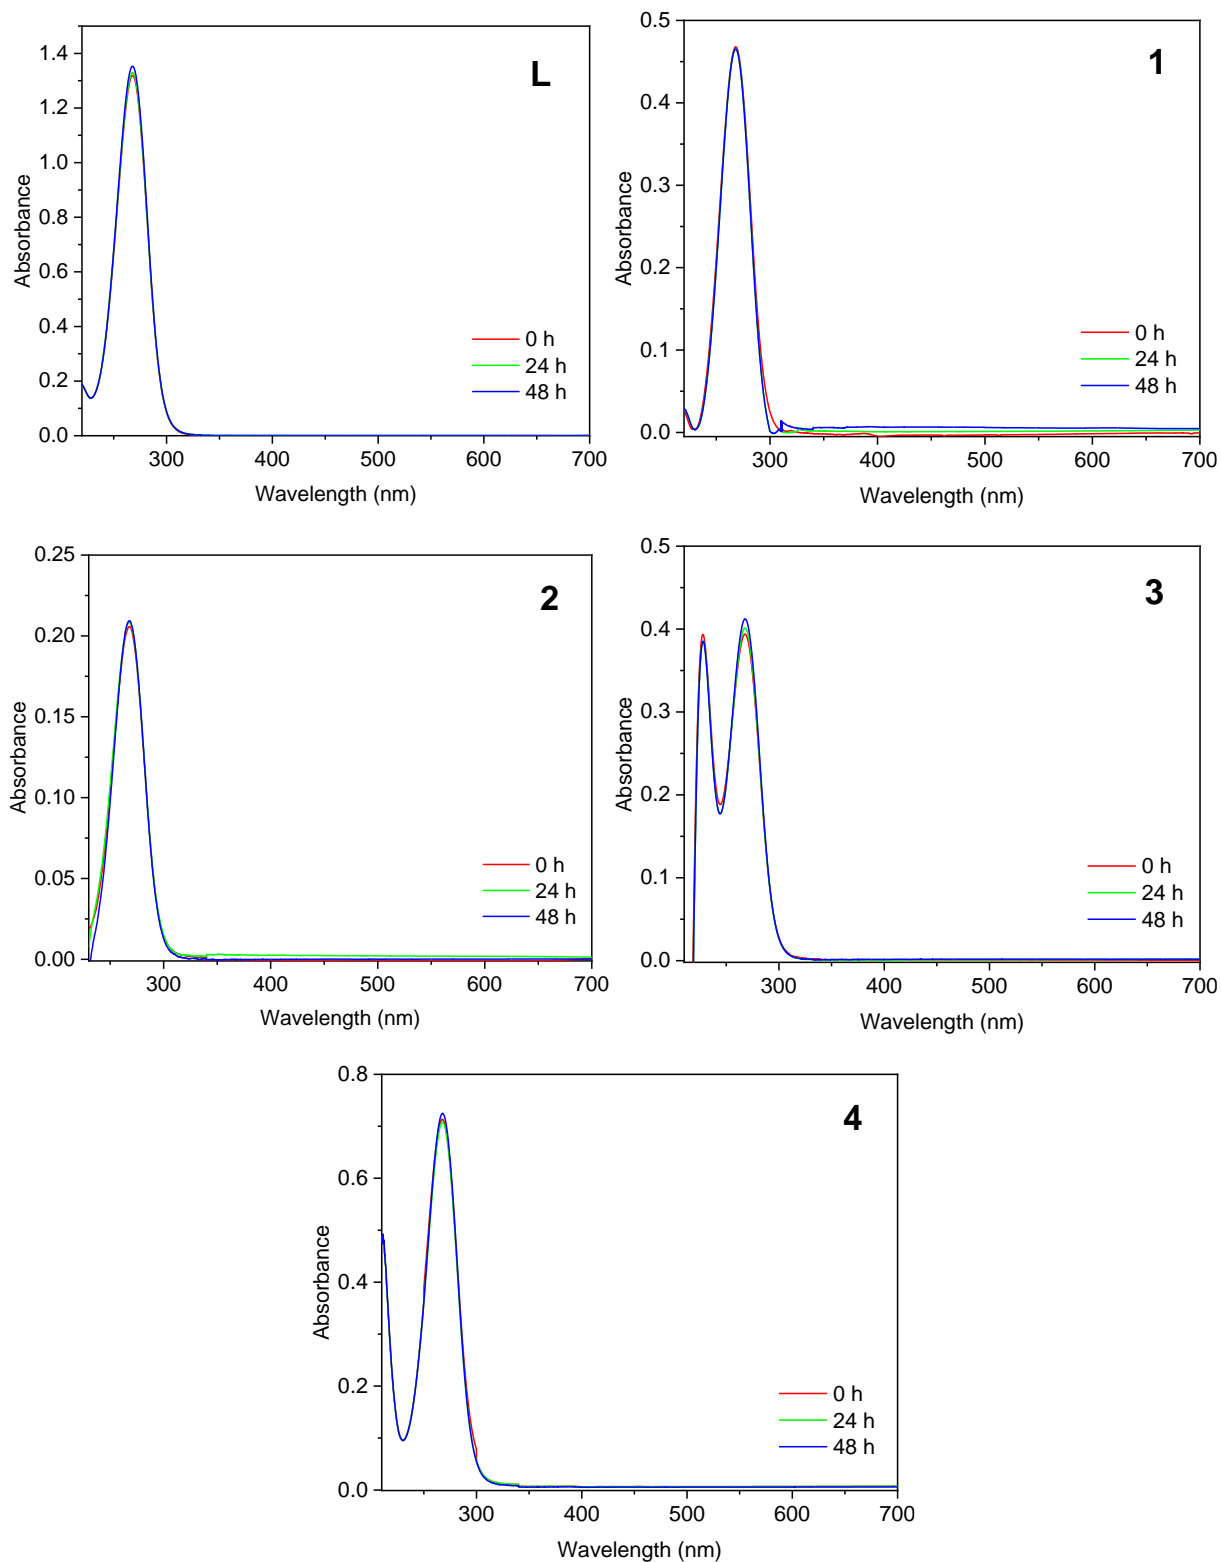

**Figure S9.** The stability studies of ligand (L) and complexes **1–4** in TE40 buffer monitored by UV-Vis at three different time points (0, 24, and 48h).  $[L] = 1 \cdot 10^{-4}$  M,  $[1-4] = 1 \cdot 10^{-5}$  M.

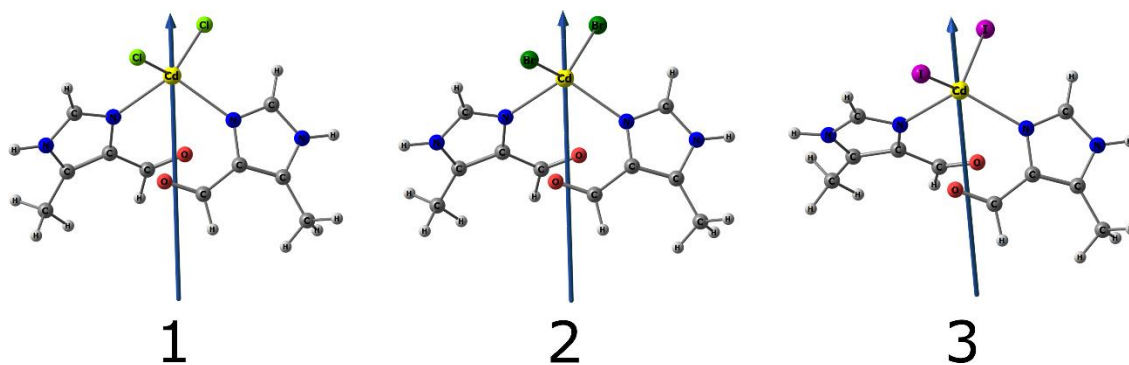

**Figure S10.** The equilibrium geometries of gas-phase optimized 1–3 compounds with corresponding dipole moment vectors.

**Table S6.**

Results of the FBO analysis of the bonds formed by Cd(II) ion within the studied coordination compounds. The bond lengths are given in Å, whereas FBO is a dimensionless quantity.

| System | Bond  | Crystal structure |       | Gas phase structure |       |
|--------|-------|-------------------|-------|---------------------|-------|
|        |       | Bond Length       | FBO   | Bond Length         | FBO   |
| 1      | Cd-Cl | 2.504             | 1.160 | 2.410               | 1.280 |
|        | Cd-Cl | 2.513             | 1.151 | 2.410               | 1.280 |
|        | Cd-N  | 2.261             | 0.813 | 2.285               | 0.819 |
|        | Cd-N  | 2.247             | 0.822 | 2.285               | 0.819 |
|        | Cd-O  | 2.630             | 0.489 | 3.312               | 0.162 |
|        | Cd-O  | 2.629             | 0.491 | 3.312               | 0.162 |
| 2      | Cd-Br | 2.658             | 1.146 | 2.532               | 1.317 |
|        | Cd-Br | 2.597             | 1.230 | 2.532               | 1.317 |
|        | Cd-N  | 2.312             | 0.774 | 2.279               | 0.823 |
|        | Cd-N  | 2.272             | 0.799 | 2.279               | 0.823 |
|        | Cd-O  | 2.610             | 0.503 | 3.232               | 0.188 |
|        | Cd-O  | 2.557             | 0.543 | 3.232               | 0.188 |
| 3      | Cd-I  | 2.787             | 1.194 | 2.700               | 1.319 |
|        | Cd-I  | 2.786             | 1.195 | 2.734               | 1.252 |
|        | Cd-N  | 2.271             | 0.811 | 2.267               | 0.833 |
|        | Cd-N  | 2.271             | 0.811 | 2.281               | 0.813 |
|        | Cd-O  | 2.7079            | 0.440 | 3.214               | 0.187 |
|        | Cd-O  | 2.7079            | 0.440 | 3.001               | 0.286 |
| 4      | Cd-N  | 2.255             | 0.851 | 2.316               | 0.692 |
|        | Cd-N  | 2.298             | 0.808 | 2.316               | 0.692 |
|        | Cd-N  | 2.266             | 0.840 | 2.316               | 0.692 |
|        | Cd-N  | 2.304             | 0.804 | 2.315               | 0.692 |
|        | Cd-O  | 2.753             | 0.431 | 2.655               | 0.371 |
|        | Cd-O  | 2.874             | 0.351 | 2.655               | 0.372 |
|        | Cd-O  | 2.620             | 0.514 | 2.655               | 0.372 |
|        | Cd-O  | 2.847             | 0.373 | 2.654               | 0.372 |

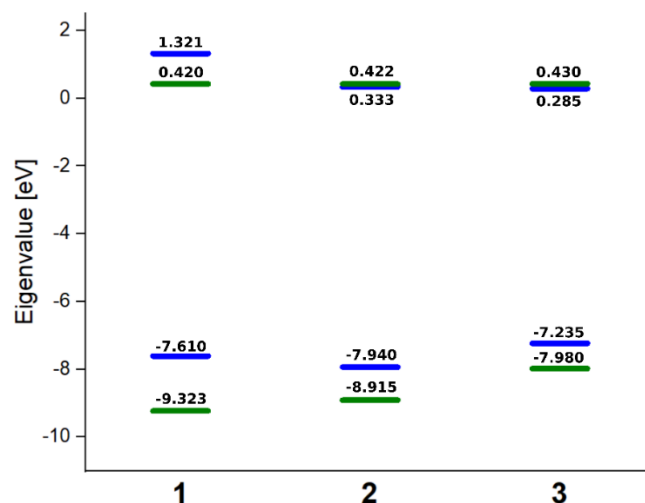

**Figure S11.** The eigenvalues of **1–3** compounds' frontier orbitals. The values marked by green and blue correspond to gas-phase and crystal structures respectively.

**Table S7.**

The molecular volumes of **1–4** systems calculated numerically with the use of the marching terathedra method (in Å<sup>3</sup>).

| System   | Volume            |                     |
|----------|-------------------|---------------------|
|          | Crystal structure | Gas-phase structure |
| <b>1</b> | 349.10            | 361.04              |
| <b>2</b> | 365.86            | 377.62              |
| <b>3</b> | 392.39            | 404.96              |
| <b>4</b> | 849.80*           | 537.67              |

\*value affected by a presence of hexafluorophosphate anions and water molecules in a crystal structure **Table S8**.

**Table S8.**

The values of Molecular Polarity Index (MPI) of **1–4** systems (in kcal·mol<sup>-1</sup>).

| System   | MPI               |                     |
|----------|-------------------|---------------------|
|          | Crystal structure | Gas-phase structure |
| <b>1</b> | 34.62             | 27.94               |
| <b>2</b> | 34.40             | 27.74               |
| <b>3</b> | 33.19             | 26.97               |

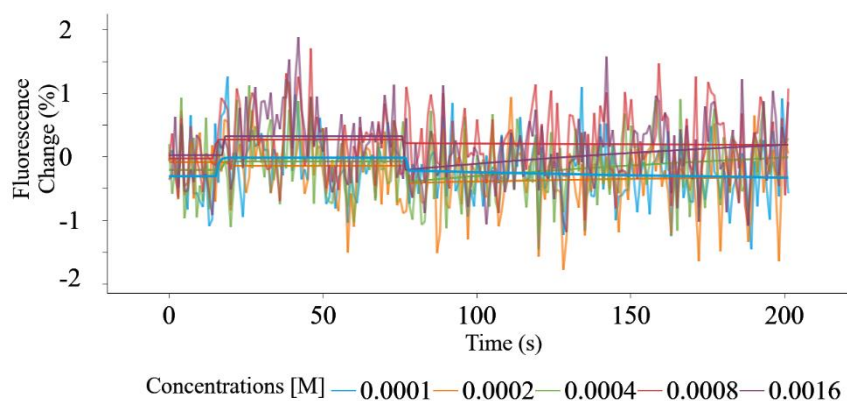

**Figure S12.** Results showing changes in fluorescence over time occurring during the analysis of the interactions of the ligand with the DNA helix performed in the static mode (weak binders) at a temperature of 25 °C.

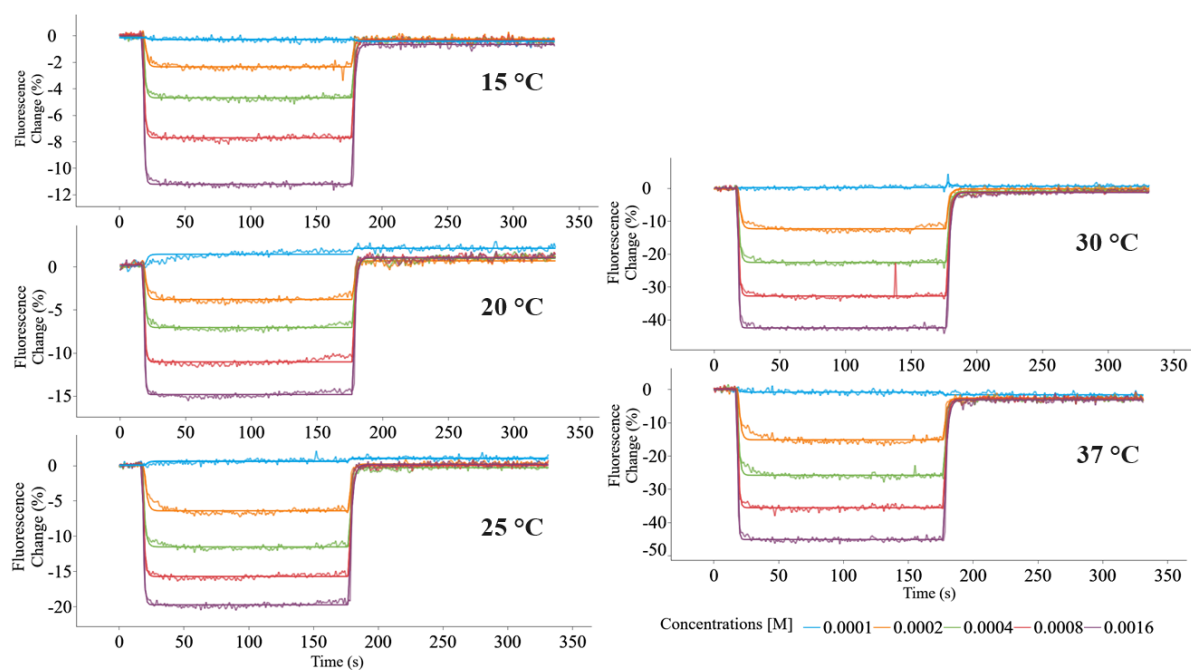

**Figure S13.** Representative results showing changes in fluorescence over time occurring during the analysis of the interactions of the complex **2** with the DNA helix performed in the static mode (weak binders) at temperatures: 15, 20, 25, 30, and 37 °C. The thinner lines in each color represent the measurement points and the bold line represents the fitted data from which the kinetic parameters are calculated.



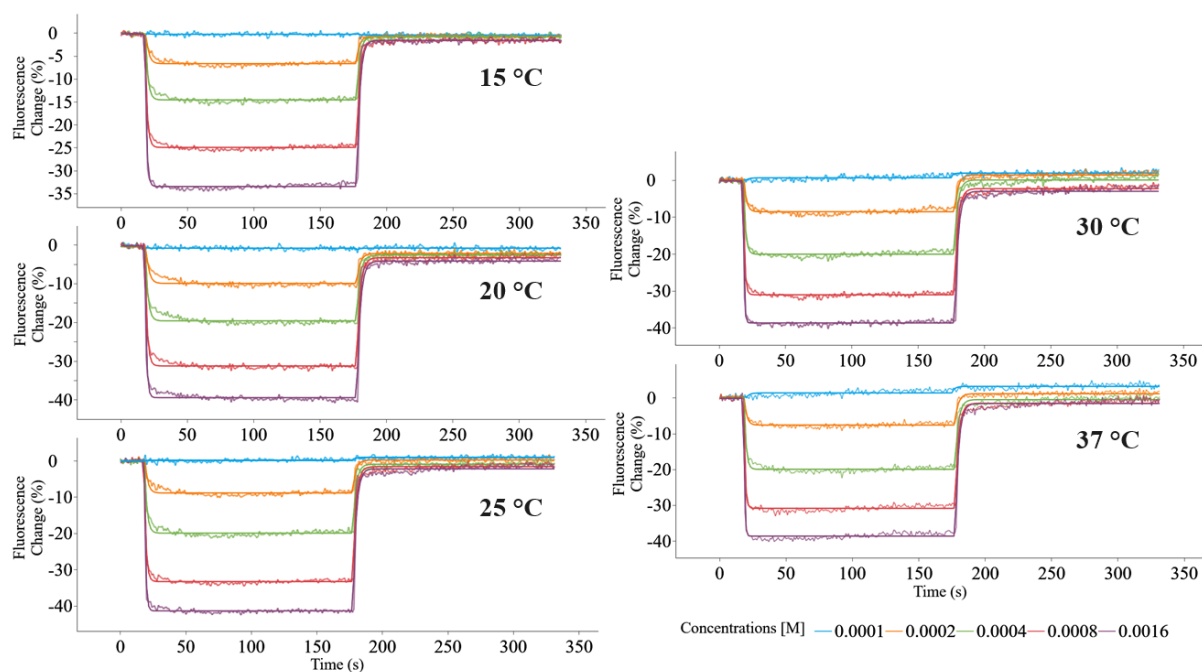

**Figure S14.** Representative results showing changes in fluorescence over time occurring during the analysis of the interactions of the complex **3** with the DNA helix performed in the static mode (weak binders) at temperatures: 15, 20, 25, 30, and 37 °C. The thinner lines in each color represent the measurement points and the bold line represents the fitted data from which the kinetic parameters are calculated.

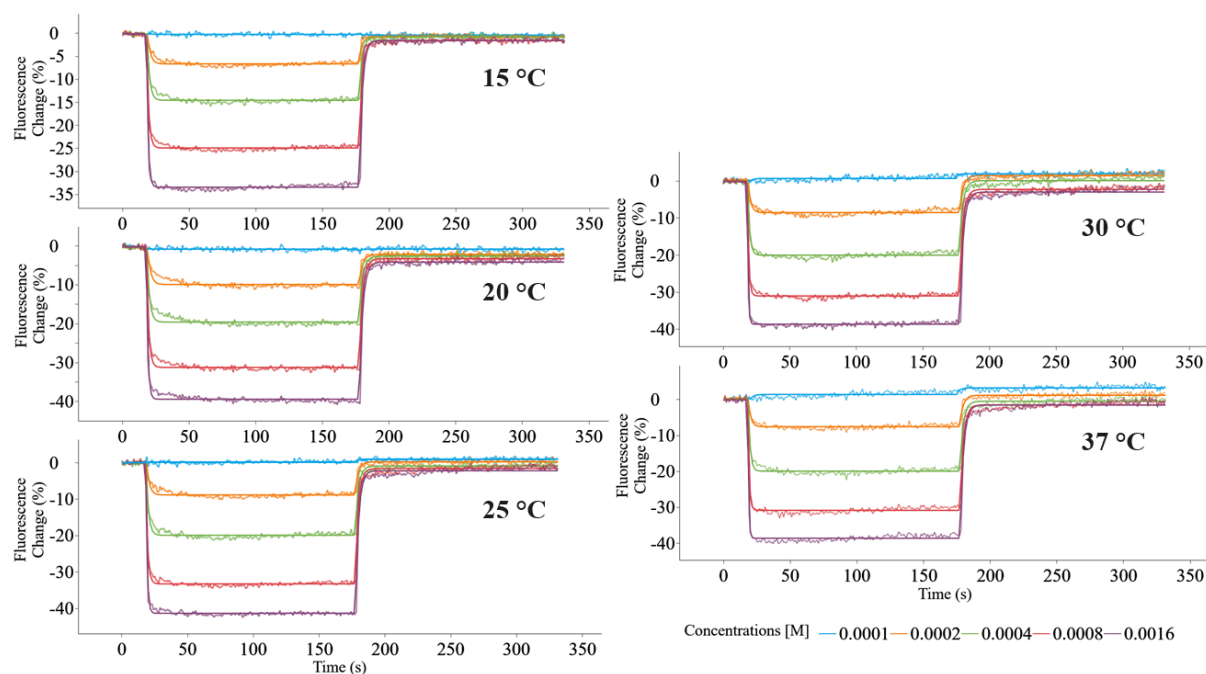

**Figure S15.** Representative results showing changes in fluorescence over time occurring during the analysis of the interactions of the complex **4** with the DNA helix performed in the static mode (weak binders) at temperatures: 15, 20, 25, 30, and 37 °C. The thinner lines in each color represent the measurement points and the bold line represents the fitted data from which the kinetic parameters are calculated.

**Table S9.** The determined values of thermodynamic parameters  $\Delta G$  (Gibbs free energy),  $\Delta H$  (enthalpy), and  $\Delta S$  (entropy) for **1–4** are based on their association constant  $K_A$ . All thermodynamic parameters were computed as given in eqs. 1–3, respectively.

| Compound | Temp. [°C] | $\Delta G$ [kJ·mol <sup>-1</sup> ] | $\Delta S$ [kJ·mol <sup>-1</sup> ·K <sup>-1</sup> ] | $\Delta H$ [kJ·mol <sup>-1</sup> ] |
|----------|------------|------------------------------------|-----------------------------------------------------|------------------------------------|
| <b>1</b> | 15         | -15.08                             | –                                                   | –                                  |
|          | 20         | -16.08                             | 0.20                                                | 42.07                              |
|          | 25         | -17.30                             | 0.24                                                | 55.45                              |
|          | 30         | -17.42                             | 0.02                                                | -10.06                             |
|          | 37         | -18.13                             | 0.10                                                | 13.50                              |
| <b>2</b> | 15         | -14.90                             | –                                                   | –                                  |
|          | 20         | -16.57                             | 0.33                                                | 81.20                              |
|          | 25         | -16.33                             | -0.05                                               | -30.34                             |
|          | 30         | -17.75                             | 0.28                                                | 68.00                              |
|          | 37         | -18.53                             | 0.11                                                | 16.22                              |
| <b>3</b> | 15         | -13.35                             | –                                                   | –                                  |
|          | 20         | -14.55                             | 0.24                                                | 55.62                              |
|          | 25         | -15.07                             | 0.10                                                | 15.69                              |
|          | 30         | -16.44                             | 0.27                                                | 66.77                              |
|          | 37         | -17.52                             | 0.15                                                | 30.19                              |
| <b>4</b> | 15         | -15.29                             | –                                                   | –                                  |
|          | 20         | -16.32                             | 0.21                                                | 44.19                              |
|          | 25         | -16.75                             | 0.09                                                | 8.82                               |
|          | 30         | -18.89                             | 0.43                                                | 110.80                             |
|          | 37         | -19.34                             | 0.06                                                | 0.61                               |

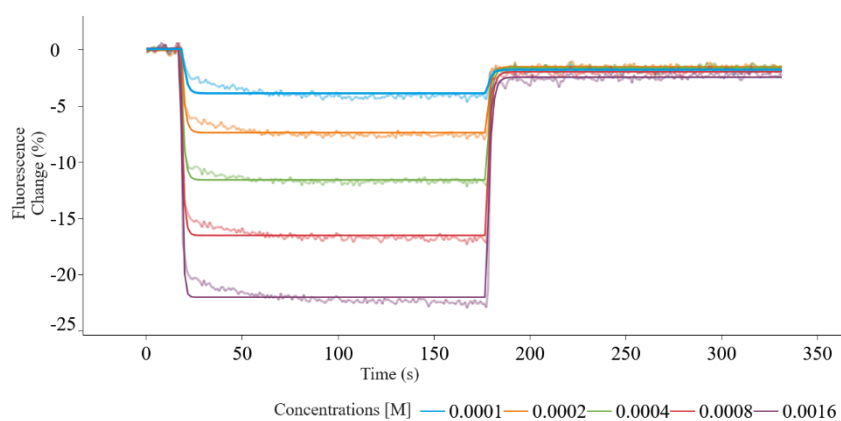

**Figure S16.** Result showing changes in fluorescence over time occurring during the analysis of the interactions of the salt  $\text{CdCl}_2$  with the DNA helix performed in the static mode (weak binders) at temperature 25 °C.

**Table S10.** Values (along with their standard deviations in the parentheses) of determined association rates  $k_a$  (in  $[M^{-1}\cdot s^{-1}]$ ), dissociation rates  $k_d$  (in  $[s^{-1}]$ ), associations constants  $K_A$  (in  $[M^{-1}]$ ), and dissociation constants  $K_D$  (in  $[M]$ ) for salt  $CdCl_2$  interactions with DNA measured by switchSense technique at temperature 25 °C.

| Compound | Temp. [°C] | $k_a$ [ $M^{-1}\cdot s^{-1}$ ] | $k_d$ [ $s^{-1}$ ]              | $K_A$ [ $M^{-1}$ ] | $K_D$ [ $M$ ]                   |
|----------|------------|--------------------------------|---------------------------------|--------------------|---------------------------------|
| $CdCl_2$ | 25         | $373 \pm 35$                   | $(5.78 \pm 0.14) \cdot 10^{-1}$ | $644 \pm 62$       | $(1.55 \pm 0.15) \cdot 10^{-3}$ |

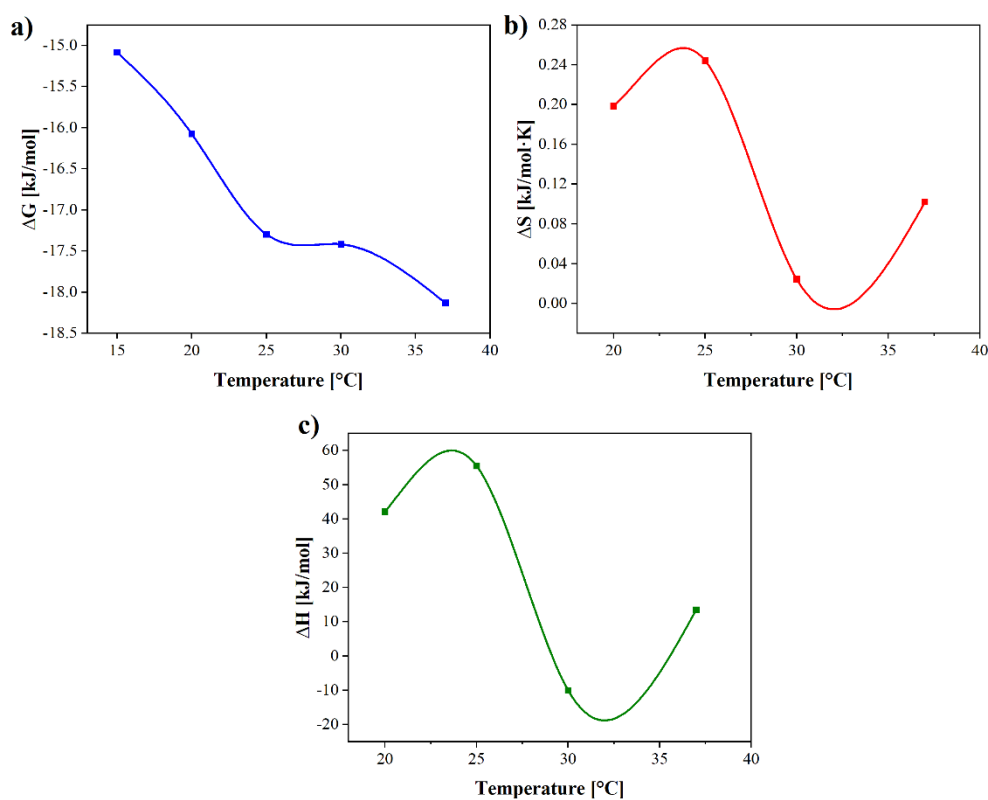

**Figure S17.** Dependence of the change of a) Gibbs free energy ( $\Delta G$ ), b) enthalpy ( $\Delta H$ ), and c) entropy ( $\Delta S$ ) as a function of temperature for the complex 1.

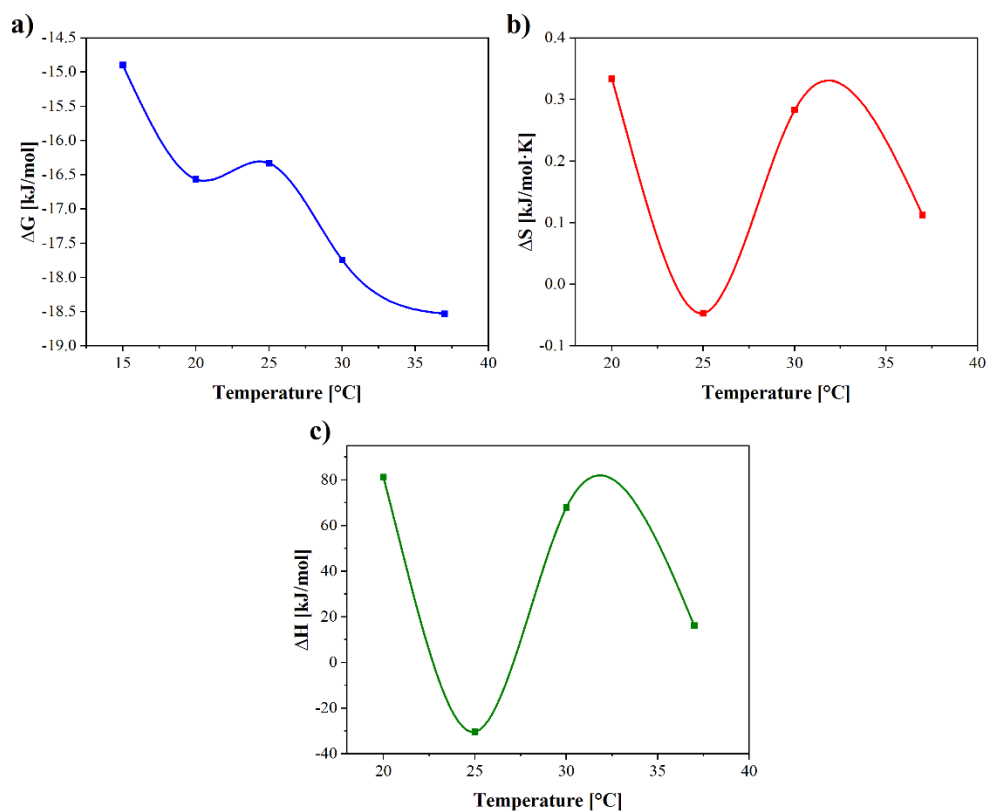

**Figure S18.** Dependence of the change of **a)** Gibbs free energy ( $\Delta G$ ), **b)** enthalpy ( $\Delta H$ ), and **c)** entropy ( $\Delta S$ ) as a function of temperature for the complex **2**.

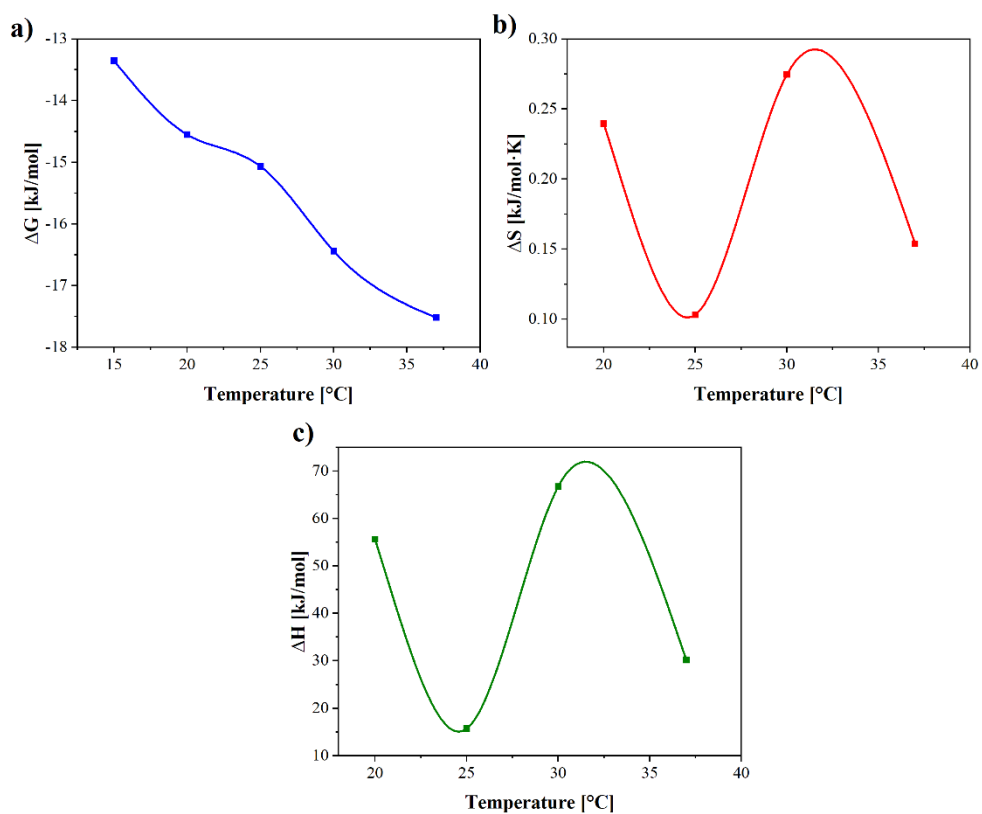

**Figure S19.** Dependence of the change of **a)** Gibbs free energy ( $\Delta G$ ), **b)** enthalpy ( $\Delta H$ ), and **c)** entropy ( $\Delta S$ ) as a function of temperature for the complex **3**.

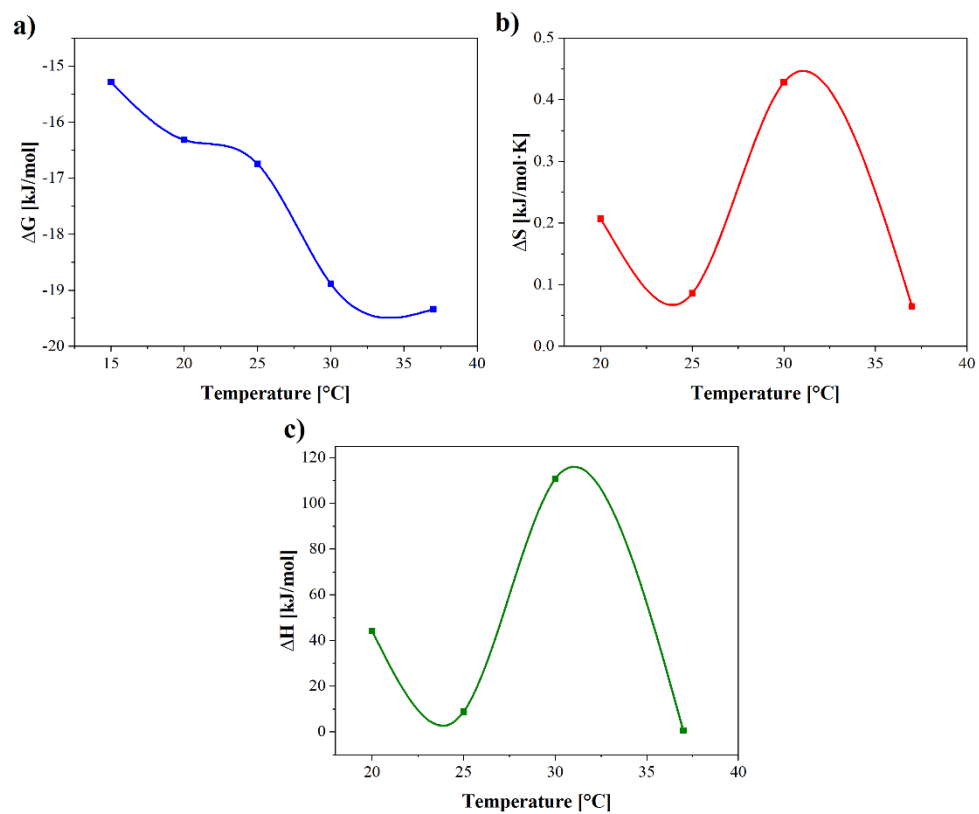

**Figure S20.** Dependence of the change of **a)** Gibbs free energy ( $\Delta G$ ), **b)** enthalpy ( $\Delta H$ ), and **c)** entropy ( $\Delta S$ ) as a function of temperature for the complex **4**.
